# Supplementary material
Source: PubMed Central journal article supplement (PMC6343486)

# Figure S1

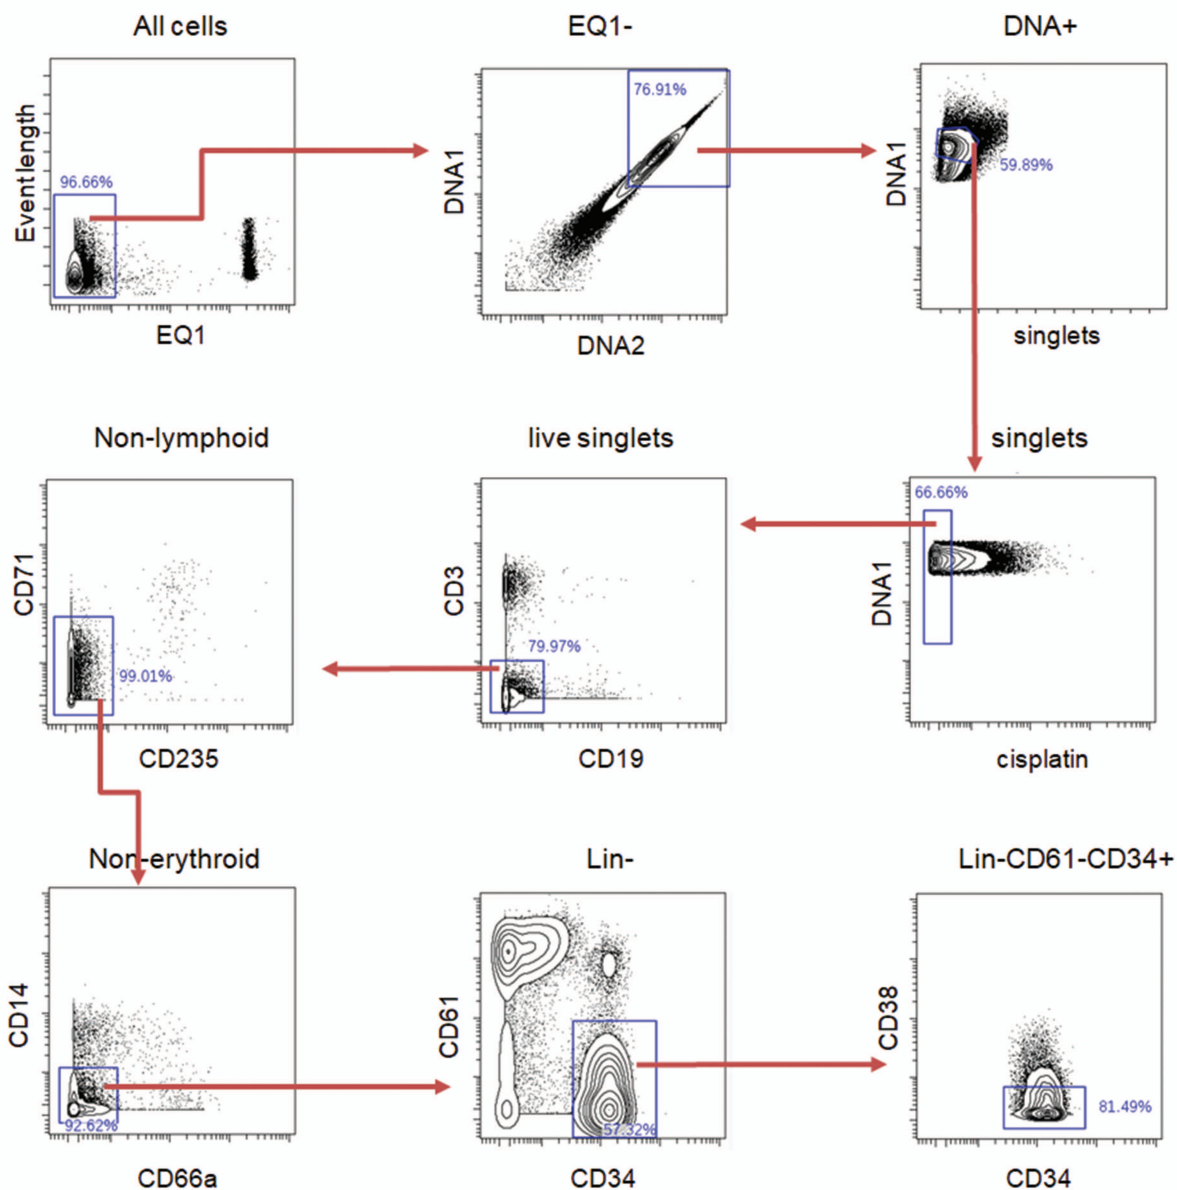

Figure S2

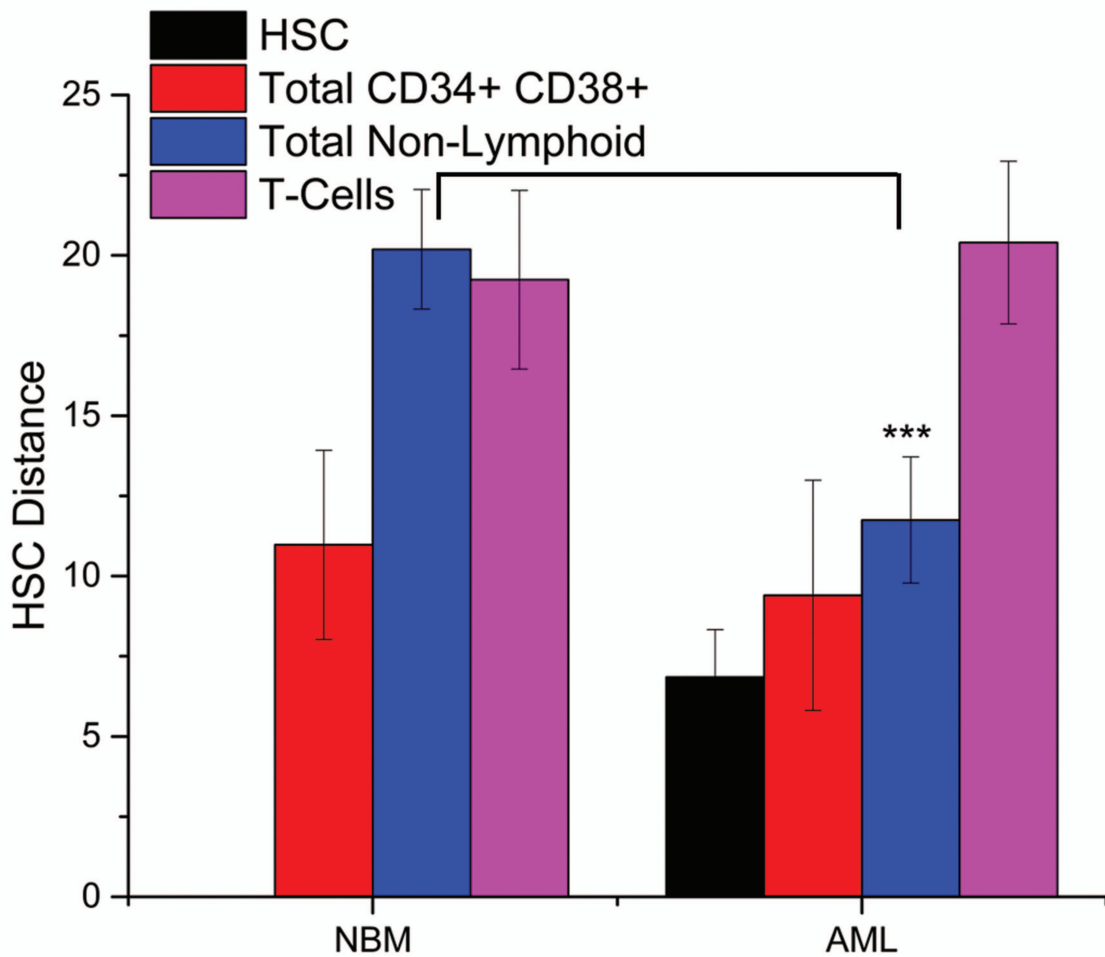



# Figure S4

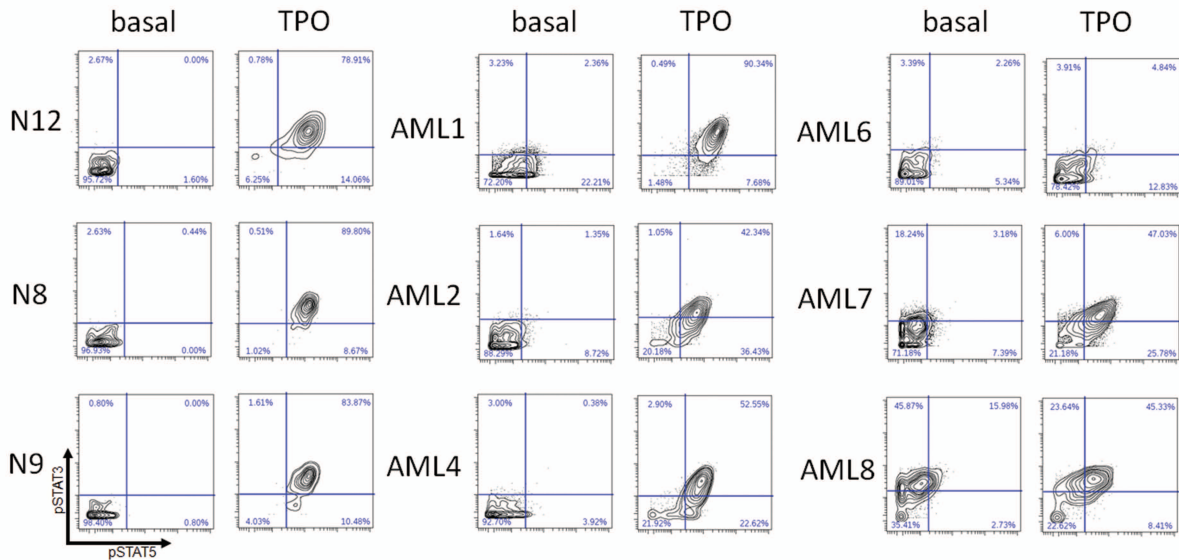



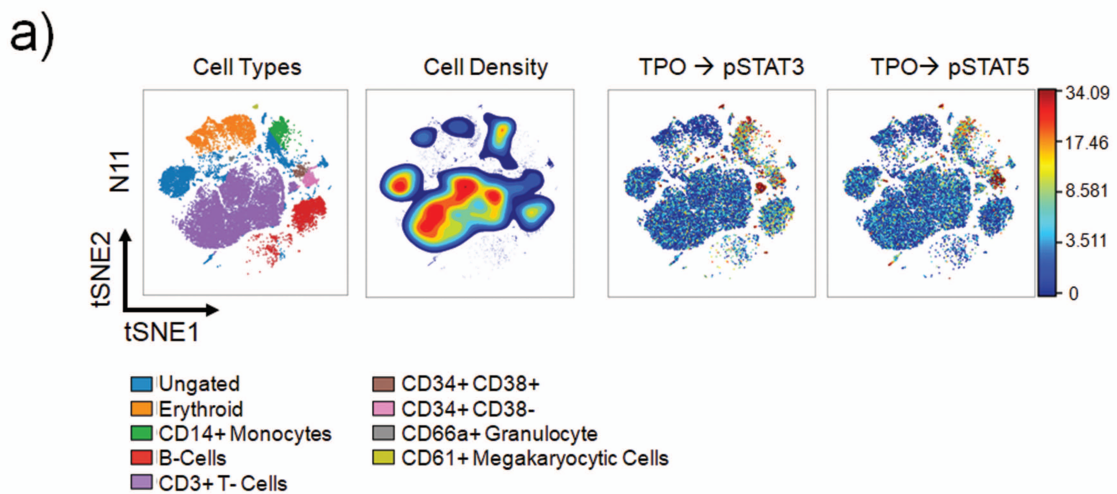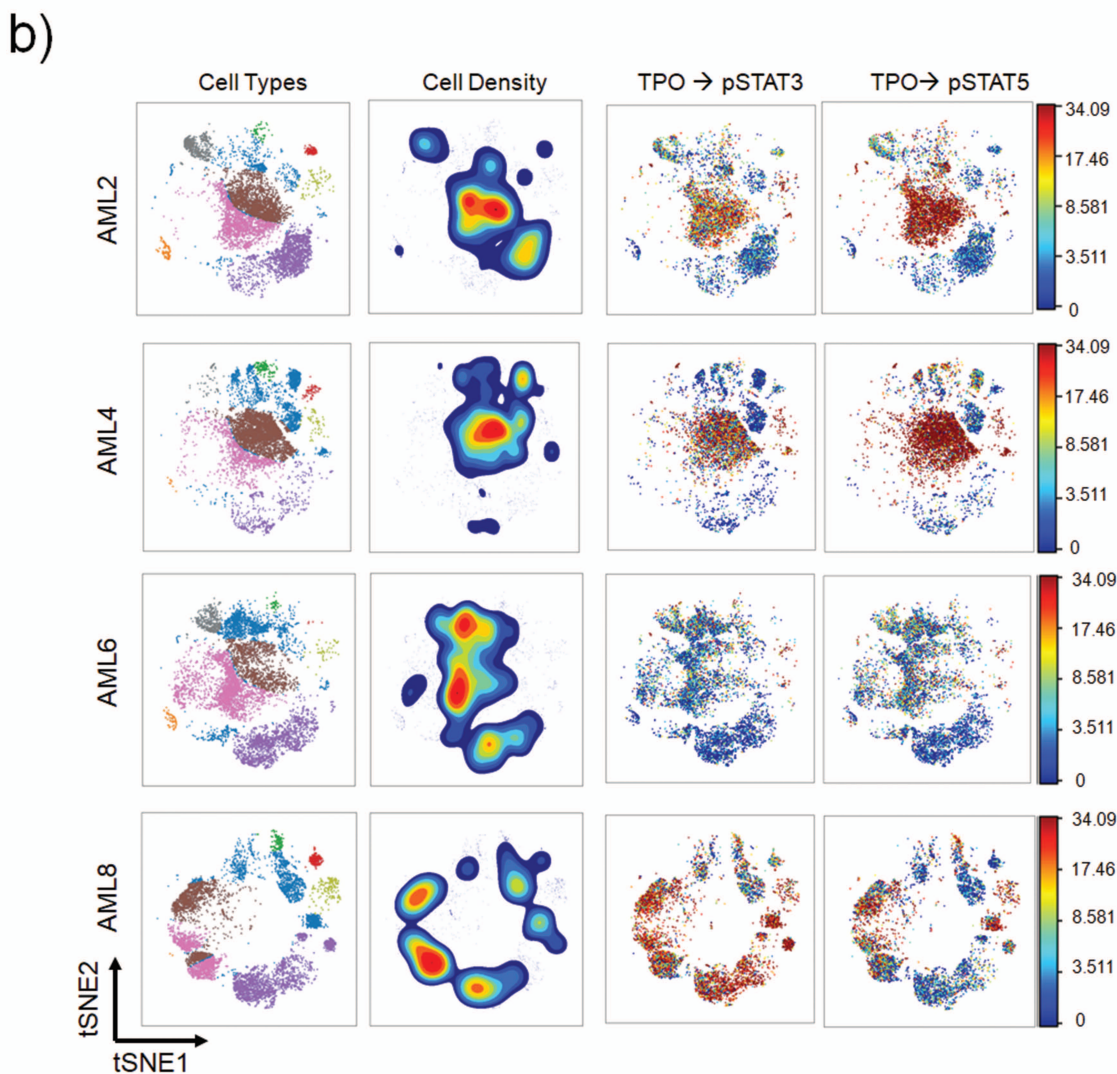

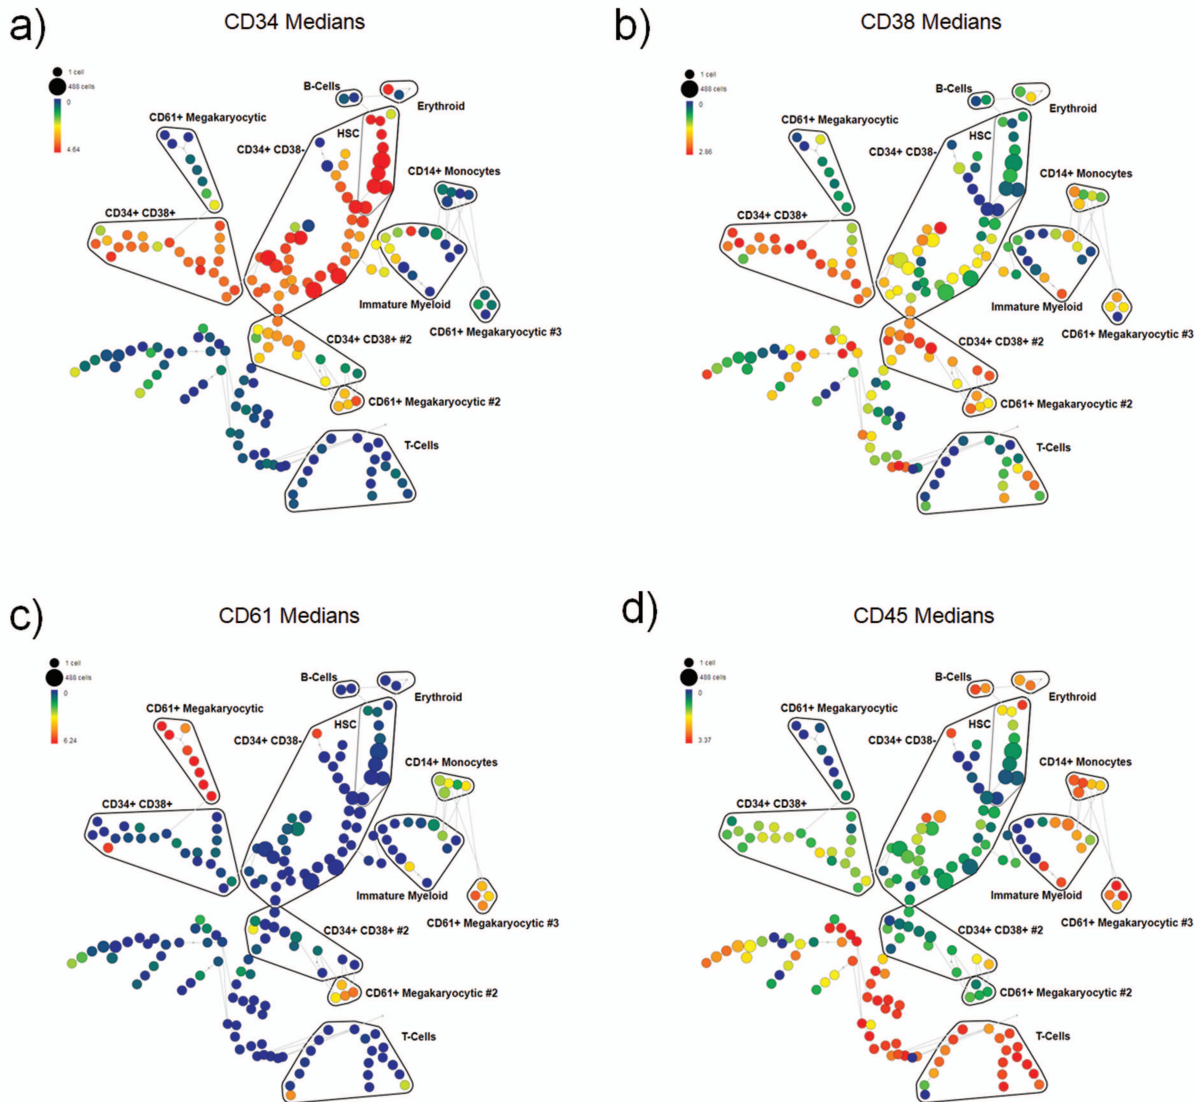

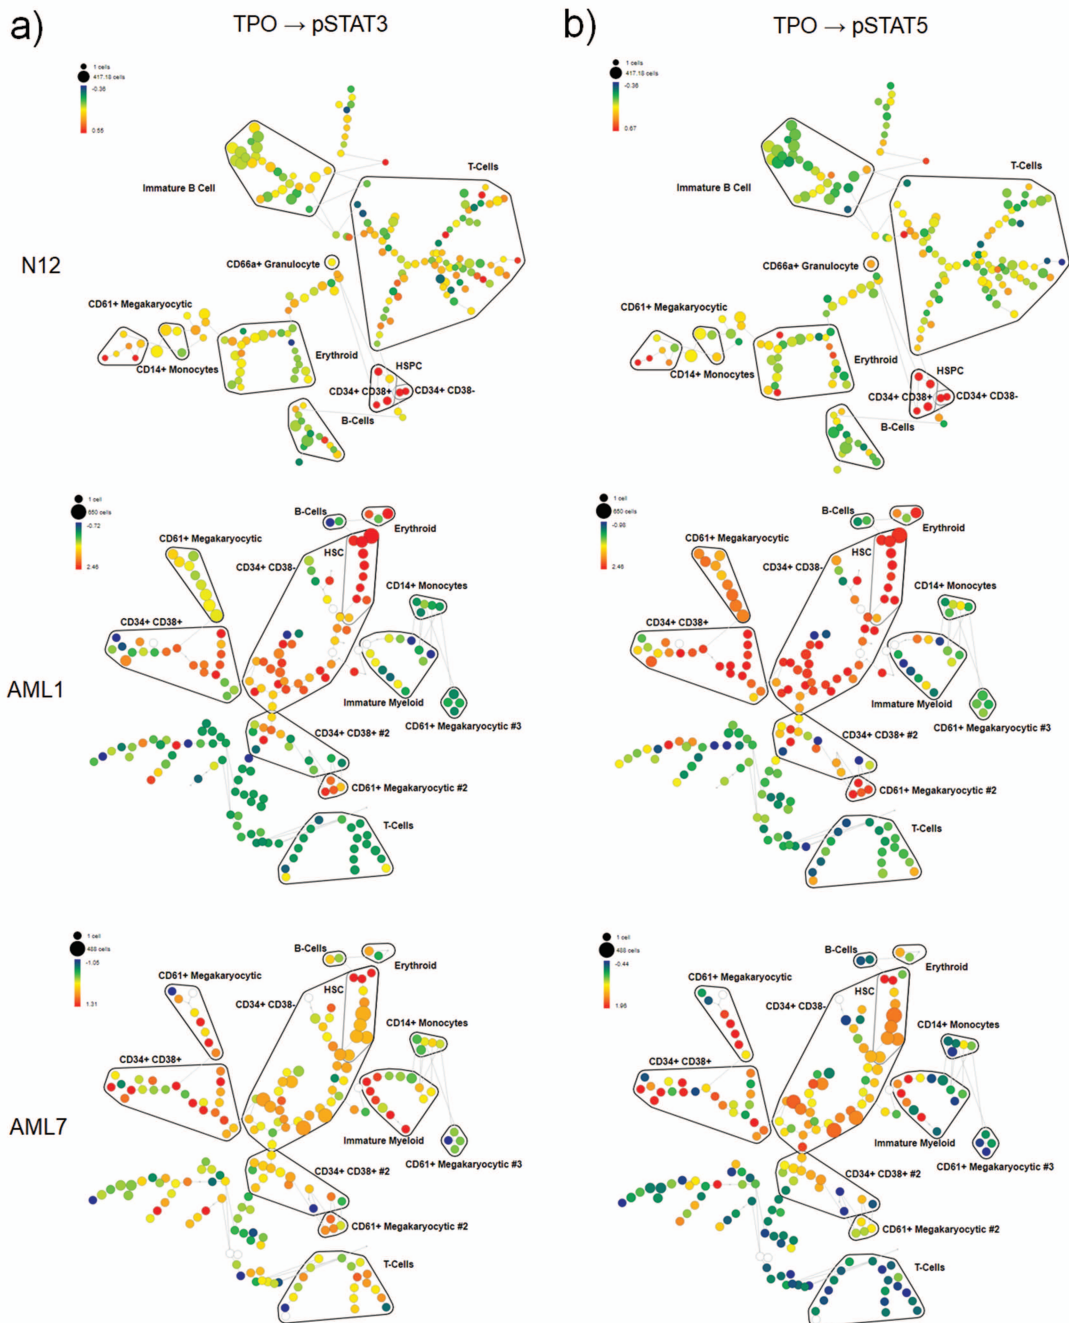

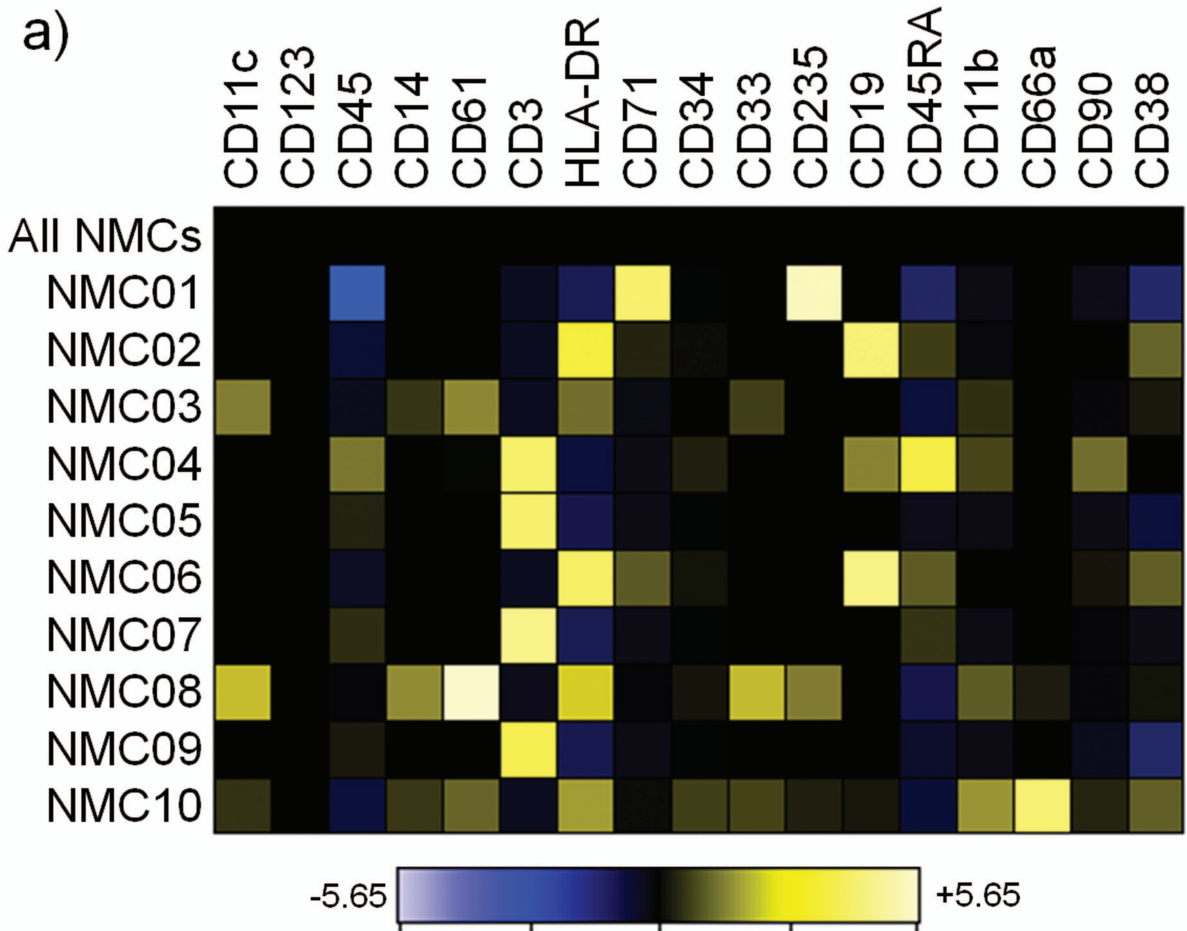

b)

| Metacluster # | Surface Marker Expression                      | Classification                         | Justification                                                                                         |
|---------------|------------------------------------------------|----------------------------------------|-------------------------------------------------------------------------------------------------------|
| 1             | CD71+ CD235+ CD45-                             | Erythroid                              | Expression of CD71 and CD235                                                                          |
| 2             | CD19+ HLA-DR+ CD45RA+ CD38+                    | B-Cells                                | CD19 and HLA-DR expression indicative of B-Cells                                                      |
| 3             | CD11c+, CD14+ CD33+, CD11b+, CD38+             | Late Myeloid Progenitors/Myeloid Cells | Expression of mature myeloid markers, small population of CD34+ cells                                 |
| 4             | CD3+ CD45RA+ CD90+                             | Naïve T Cells                          | CD3 and CD45RA expression                                                                             |
| 5             | CD3+ CD45RA -                                  | Active T-Cells                         | CD3 and lack of CD45RA                                                                                |
| 6             | CD19+ HLA-DR+, CD45RA+, CD38+                  | B-Cells                                | CD19 and HLA-DR expression indicative of B-Cells                                                      |
| 7             | CD3+ CD45RA-                                   | Active T-Cells                         | CD3 and lack of CD45RA                                                                                |
| 8             | CD11c+ CD14+ CD61+ HLA-DR+ CD11b+ CD38+ CD33hi | Monocytes                              | CD14, CD33, and CD11b expression along with lack of CD34. CD61 suggests monocyte-platelet aggregates. |
| 9             | CD3+ CD45RA - CD90- CD38                       | Active T Cells                         | CD3 and lack of CD45RA expression                                                                     |
| 10            | CD34+ CD38+ CD66a+                             | Early Myeloid Cells                    | CD34 and CD38 expression. Includes some mature myeloid cells with CD66a                               |

Figure S9

a)

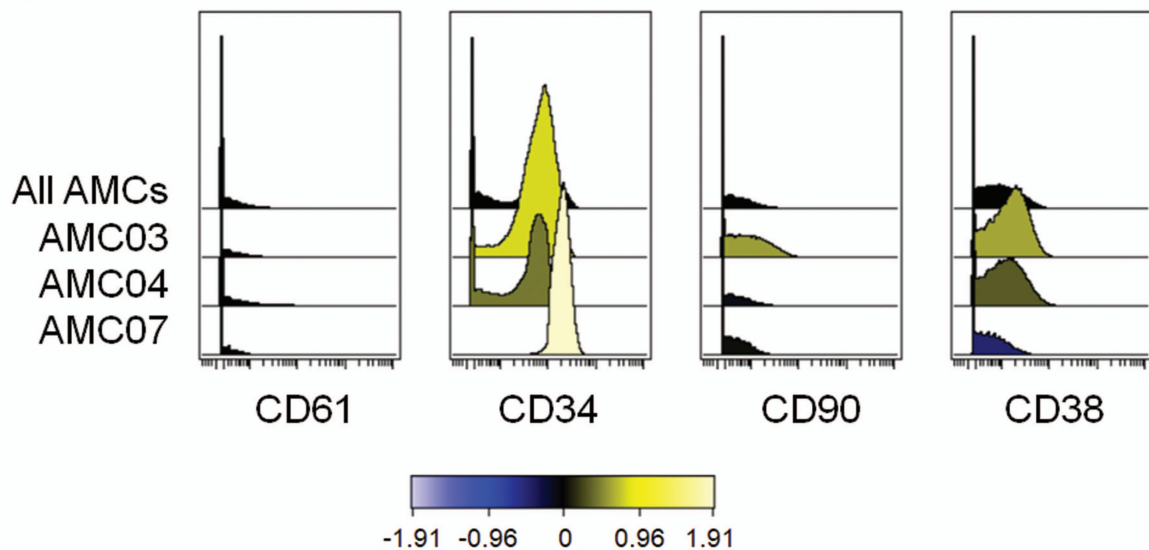

b)

|          | CD61 | CD34 | CD90 | CD38  |
|----------|------|------|------|-------|
| All AMCs | 0.0  | 0.0  | 0.0  | 0.0   |
| AMC03    | 0.0  | 0.81 | 0.59 | 0.62  |
| AMC04    | 0.0  | 0.45 | -0.1 | 0.34  |
| AMC07    | 0.0  | 1.91 | 0.04 | -0.45 |



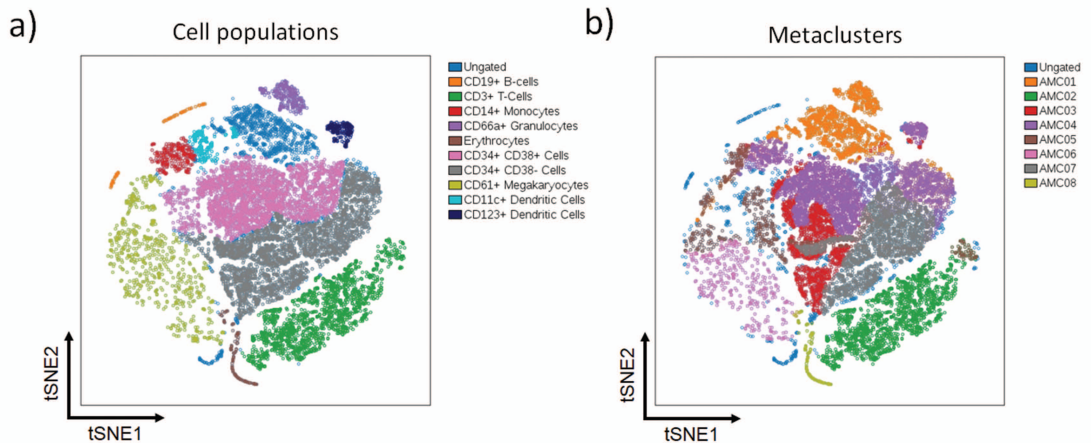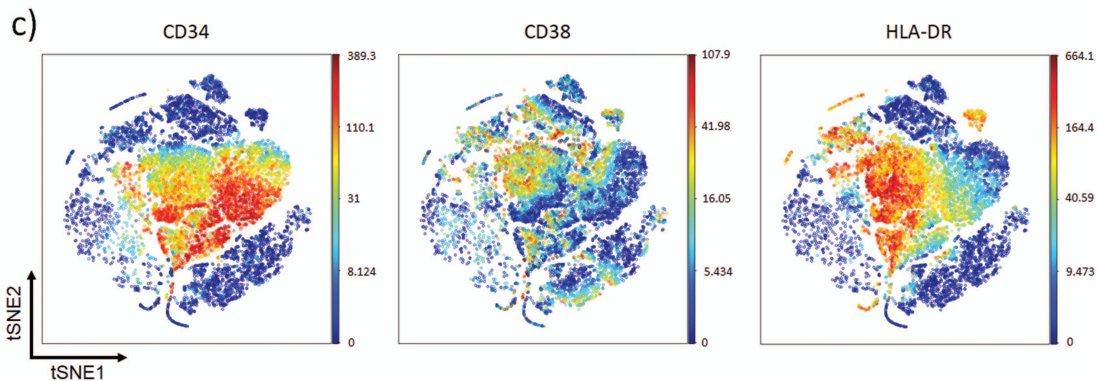

d)

| Metacluster | % CD34 positive | % CD38 positive | % HLA-DR positive |
|-------------|-----------------|-----------------|-------------------|
| AMC03       | 87.52           | 61.89           | 99.96             |
| AMC04       | 69.99           | 52.33           | 70.1              |
| AMC07       | 99.99           | 21.83           | 77.24             |

Figure S8

CD45

CD61

CD34

CD38

CD90

AML1

AML2

AML4

AML6

AML7

AML8

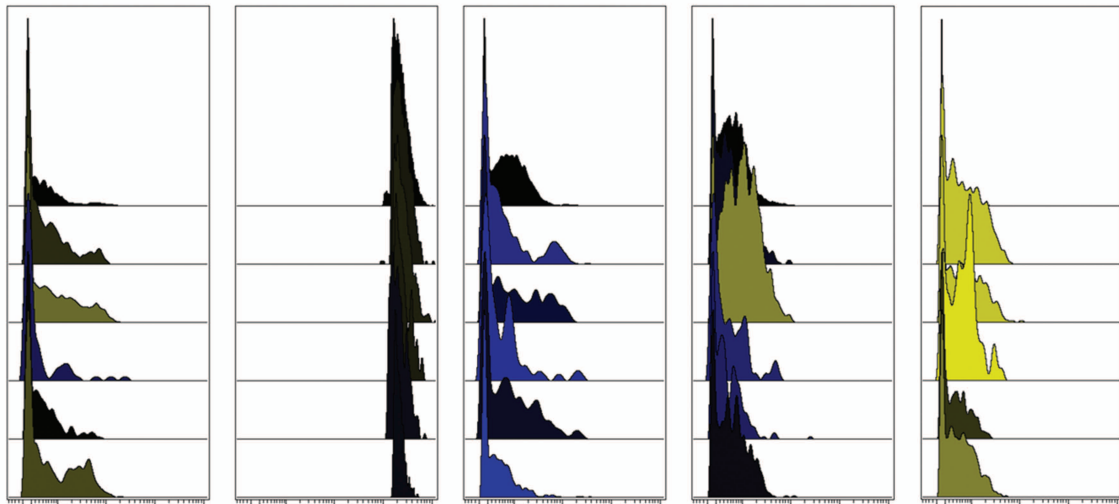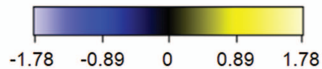

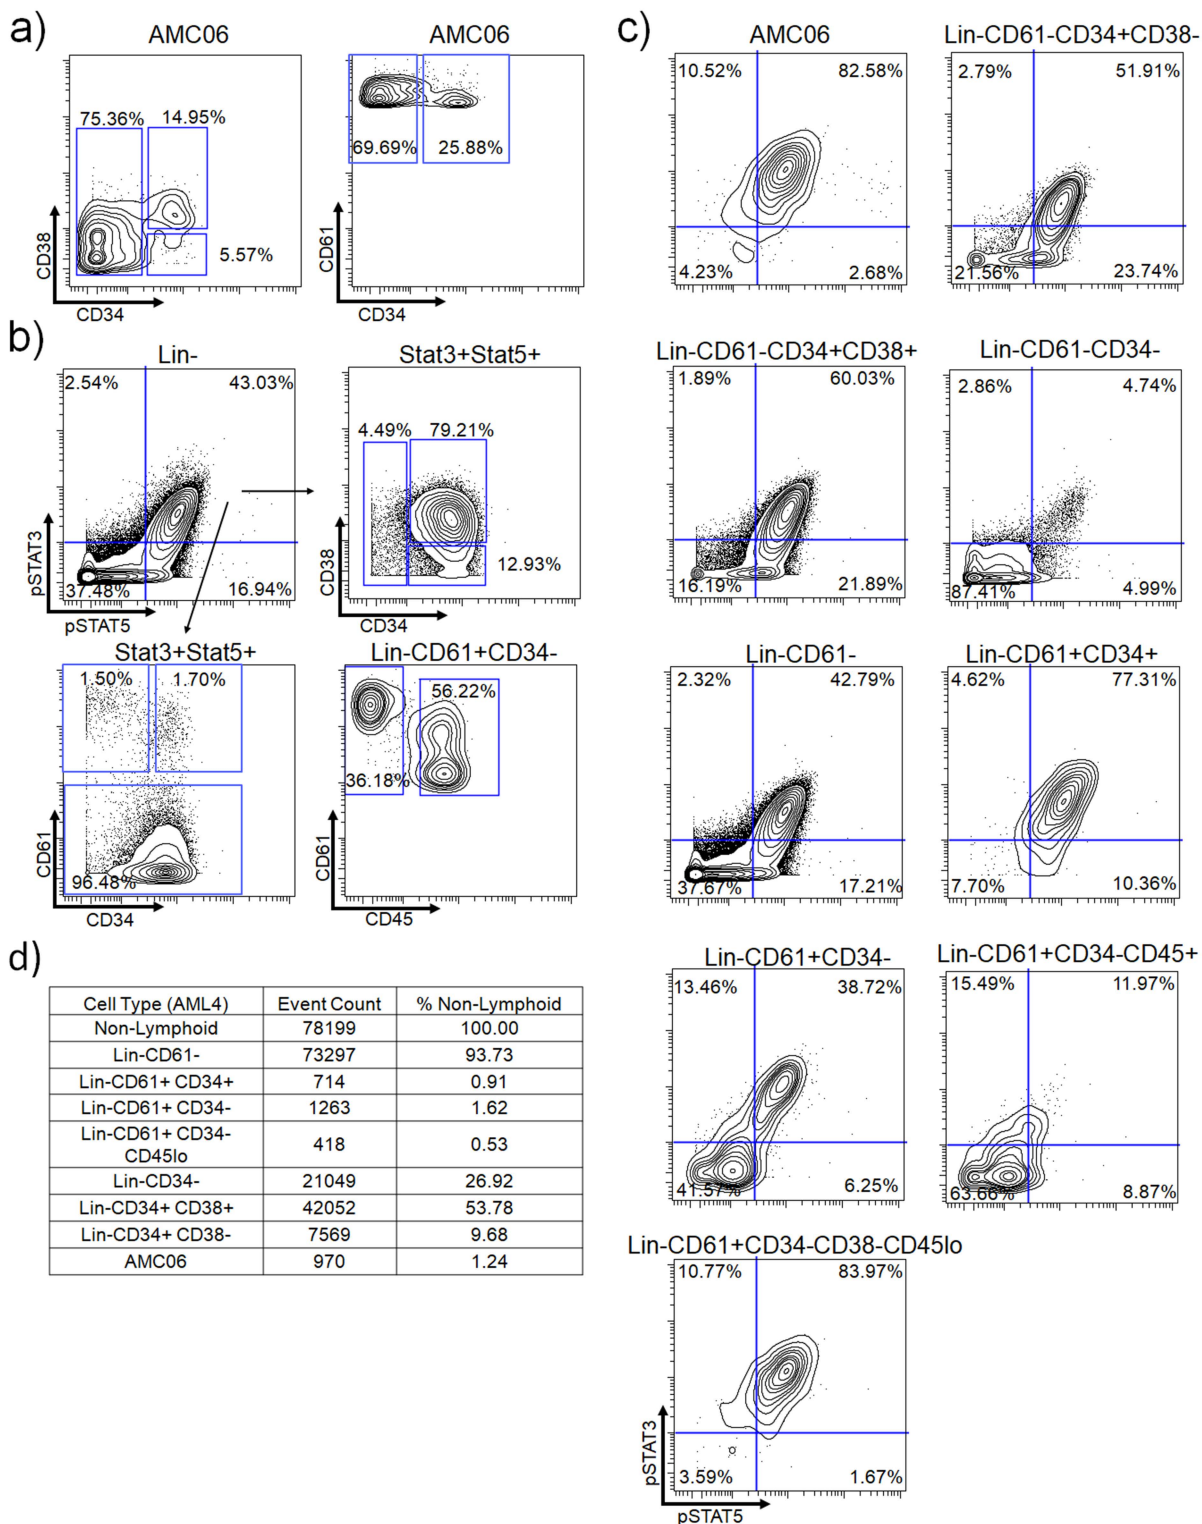



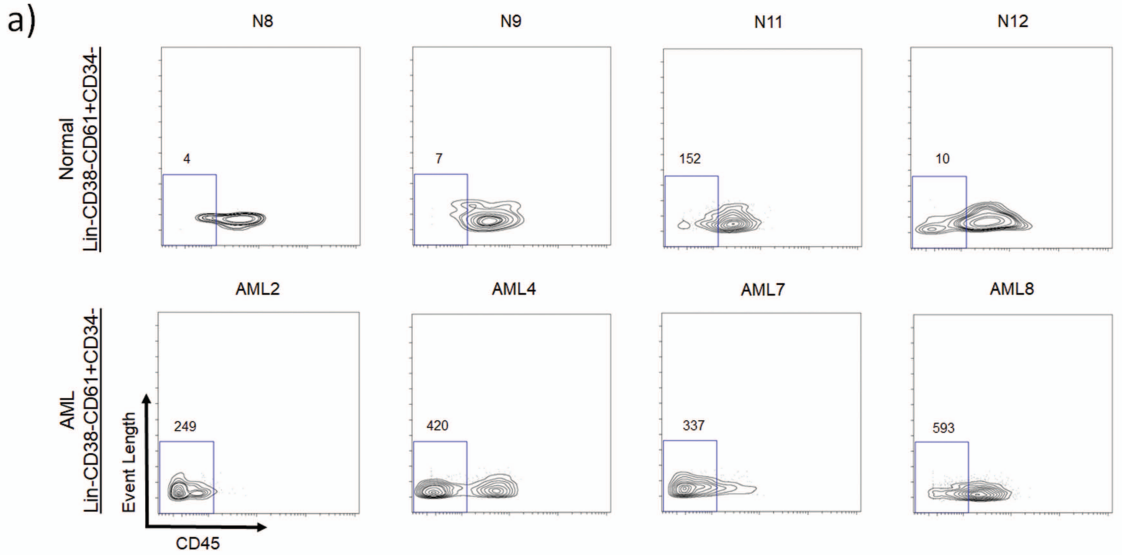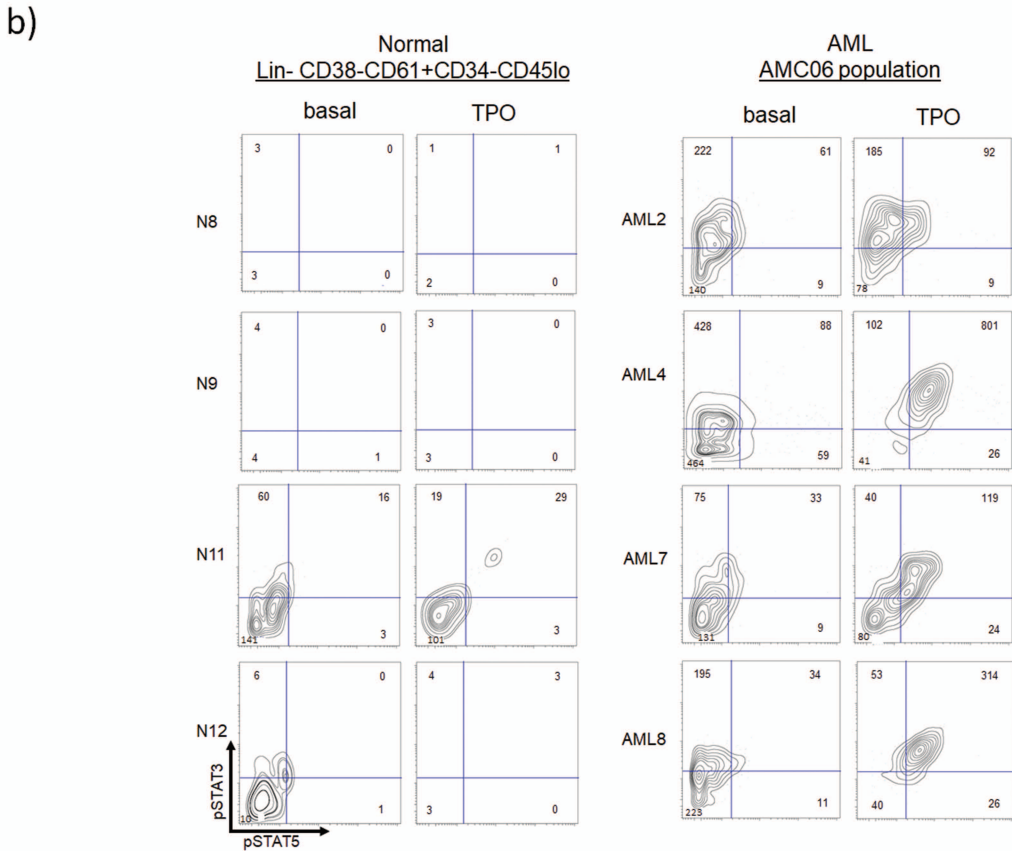

Figure S14

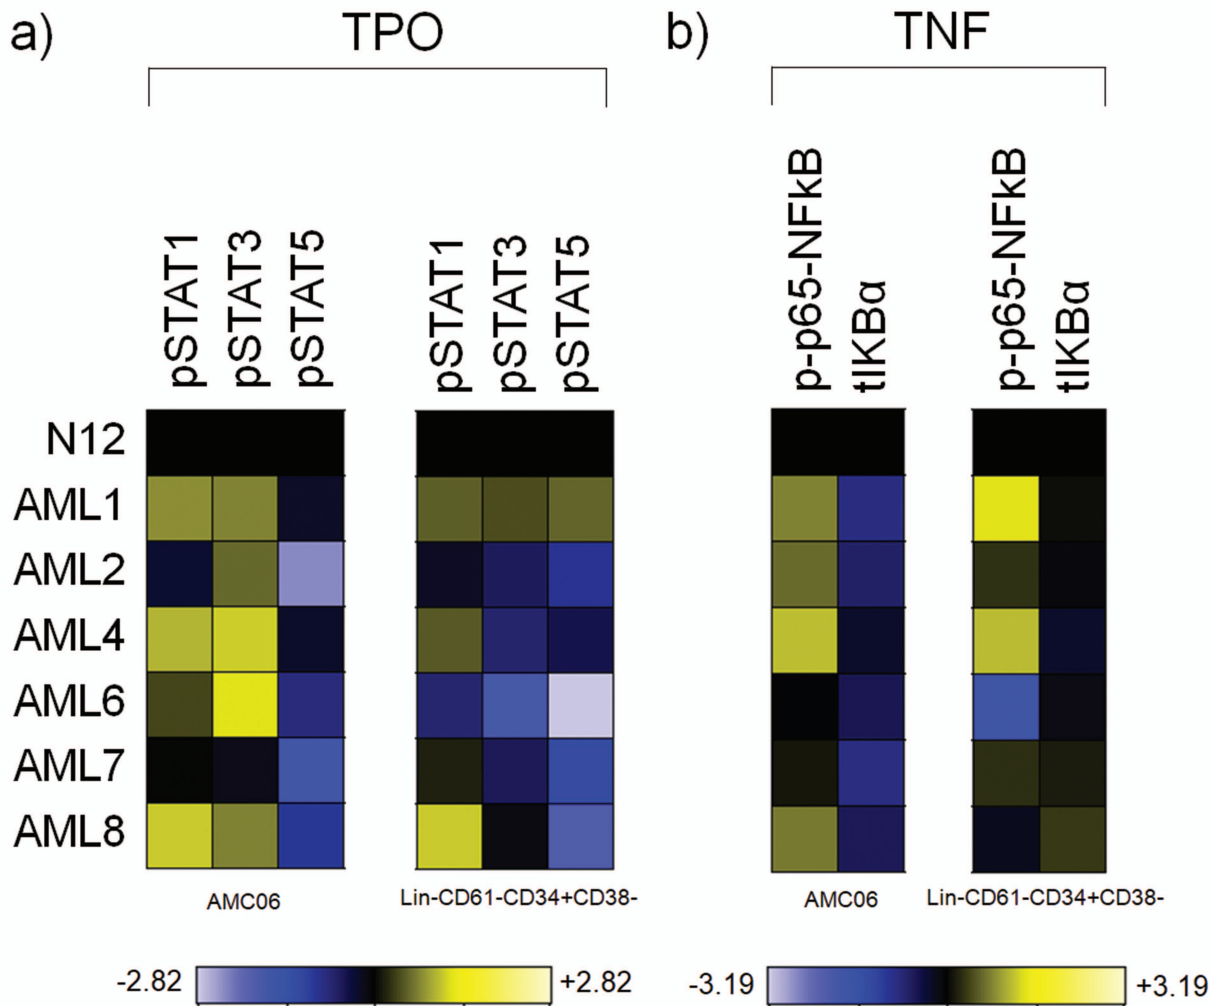

Figure S15

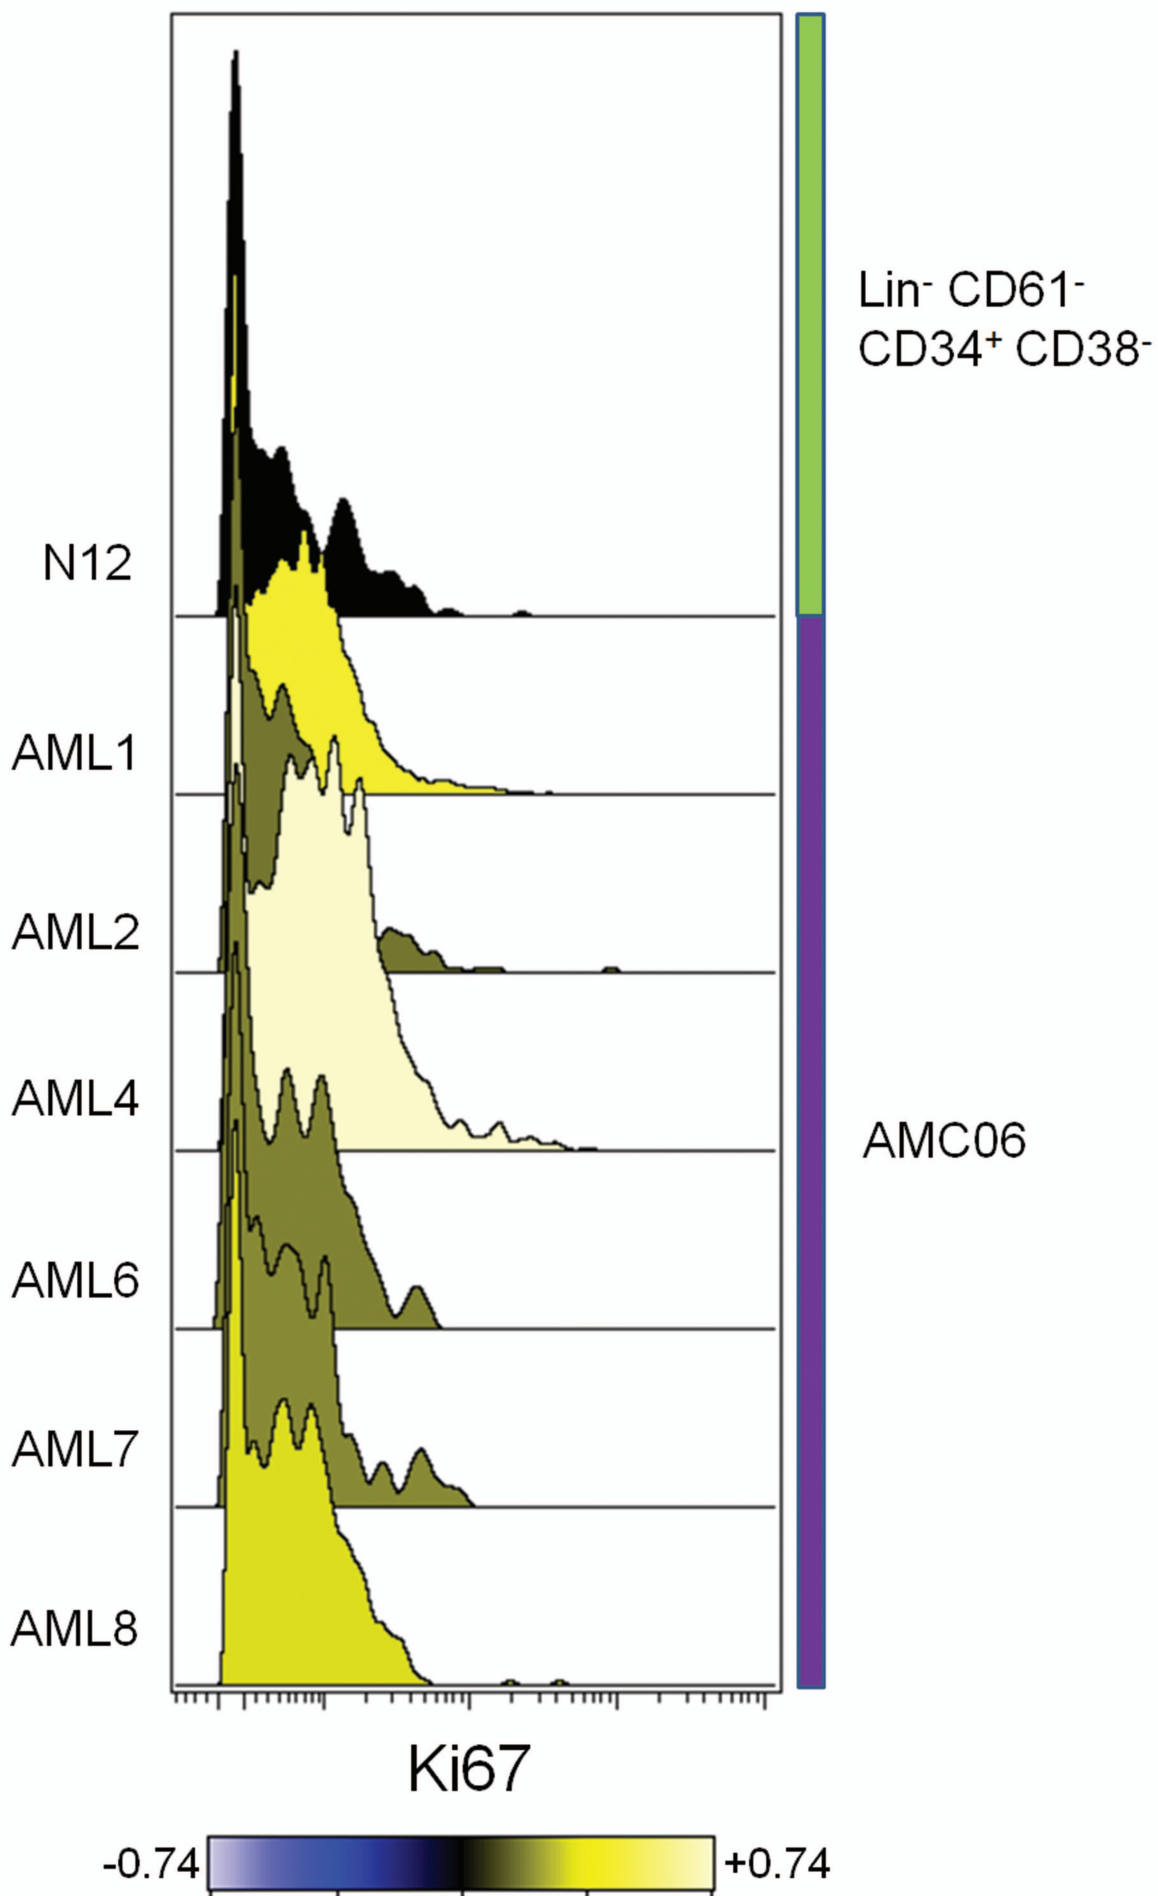

Supplement: NIHMS993630-supplement-Supp_Fig.pdf [file NIHMS993630-supplement-Supp_Fig.pdf]
